# Supplementary material for: Oxidative Stress and Antioxidant Status in High-Risk Prostate Cancer Subjects
Source: PubMed Central journal article supplement (PMC7151307; doi:10.3390/diagnostics10030126), 2020-02-27
Supplement: diagnostics-10-00126-s001.pdf [file diagnostics-10-00126-s001.pdf]

**Supplemental Table 1.** Serum PSA values of healthy control and high risk subjects.

| <b>HEALTHY SUBJECTS</b> |           | <b>PSA VALUE</b> |
|-------------------------|-----------|------------------|
| <b>Number</b>           | <b>ID</b> | <b>ng/ml</b>     |
| 1                       | C-001     | 0.84             |
| 2                       | C-002     | 1.43             |
| 3                       | C-003     | 6.34             |
| 4                       | C-004     | 1.19             |
| 5                       | C-005     | 3.1              |
| 6                       | C-006     | 2.22             |
| 7                       | C-007     | 2.3              |
| 8                       | C-008     | 1.19             |
| 9                       | C-009     | 2.22             |
| 10                      | C-010     | 1.19             |
| 11                      | C-011     | 5.71             |
| 12                      | C-012     | 1.35             |
| 13                      | C-013     | 2.14             |
| 14                      | C-014     | 2.93             |
| 15                      | C-015     | 1.4              |
| 16                      | C-016     | 2.69             |
| 17                      | C-017     | 3.97             |
| 18                      | C-018     | 4.68             |
| 19                      | C-019     | 2.3              |
| 20                      | C-020     | 2.77             |

Range 0.84 to 6.34 ng/ml; Average  $2.598 \pm 1.53$  ng/ml

| <b>HIGH-RISK SUBJECTS</b> |           | <b>PSA VALUE</b> |
|---------------------------|-----------|------------------|
| <b>Number</b>             | <b>ID</b> | <b>ng/ml</b>     |
| 1                         | HR-001    | 9.76             |
| 2                         | HR-002    | 21.27            |
| 3                         | HR-003    | 20.71            |
| 4                         | HR-004    | 17.77            |
| 5                         | HR-005    | 13.09            |
| 6                         | HR-006    | 34.44            |
| 7                         | HR-007    | 15.63            |
| 8                         | HR-008    | 27.46            |
| 9                         | HR-009    | 14.76            |
| 10                        | HR-010    | 13.73            |
| 11                        | HR-011    | 8.65             |
| 12                        | HR-012    | 15.0             |
| 13                        | HR-013    | 17.54            |
| 14                        | HR-014    | 26.34            |
| 15                        | HR-015    | 9.84             |
| 16                        | HR-016    | 7.32             |
| 17                        | HR-017    | 13.33            |
| 18                        | HR-018    | 15.23            |
| 19                        | HR-019    | 28.89            |
| 20                        | HR-020    | 15.55            |

Range 7.32 to 34.44 ng/ml; Average  $17.315 \pm 7.03$  ng/ml  
Control *versus* High-risk *P*-value < 0.0001
